# Supplementary material for: Highly efficient mRNA delivery with nonlinear microfluidic cell stretching for cellular engineering
Source: Royal Society of Chemistry journal article supplement (doi:10.1039/d2lc01115h), 2023-01-01
Supplement: d2lc01115h3.pdf [file d2lc01115h3.pdf]

Supplementary information for:

## Highly efficient mRNA delivery with nonlinear microfluidic cell stretching for cellular engineering

Chan Kwon<sup>a,b</sup> and Aram J. Chung<sup>\*,a,b,c,d</sup>

<sup>a</sup> Department of Bioengineering, Korea University, 02841 Seoul, Republic of Korea.

<sup>b</sup> Interdisciplinary Program in Precision Public Health (PPH), Korea University, 02841 Seoul, Republic of Korea.

<sup>c</sup> School of Biomedical Engineering, Korea University, 02841 Seoul, Republic of Korea.

<sup>d</sup> MxT Biotech, 04785 Seoul, Republic of Korea.

\*Corresponding Author: E-mail: [ac467@korea.ac.kr](mailto:ac467@korea.ac.kr)

## Supplementary Figure

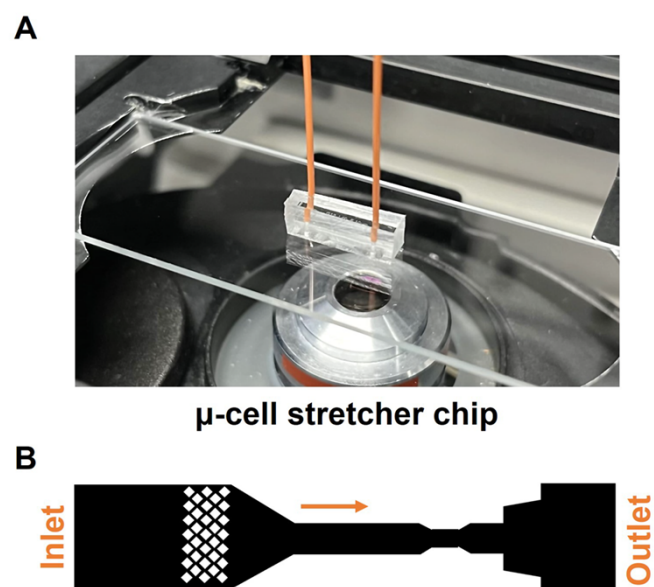

**Figure S1. Platform layout.** (A) Photograph of the delivery chip device at the microscopic stage. (B) Mock CAD design of the  $\mu$ -cell stretcher.

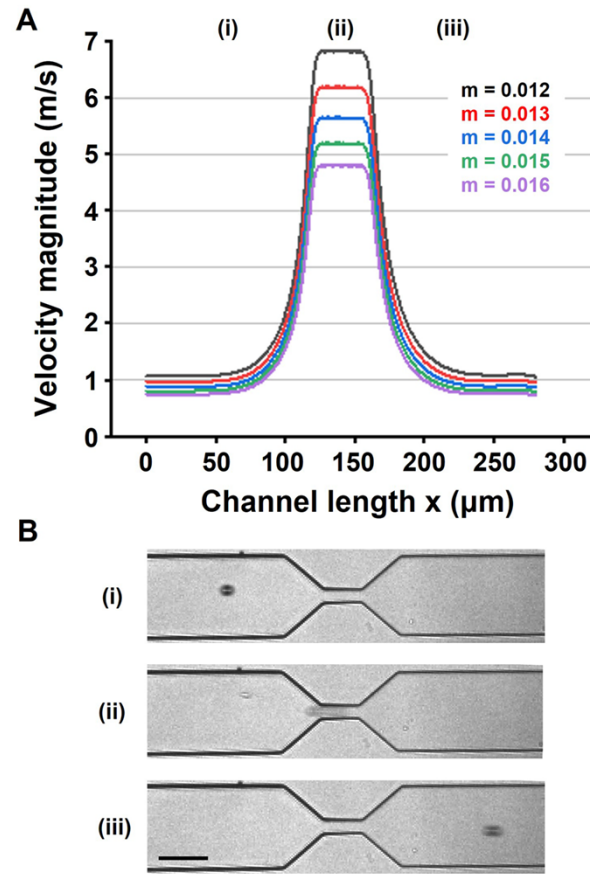

**Figure S2. Velocity profile near the deformation region.** (A) Velocity profiles for five different  $m$  (fluid consistency coefficient) values obtained using the finite element analysis (FEA) software package COMSOL Multiphysics 6.0. (B) High-speed microscope images showing 9.9  $\mu\text{m}$  microspheres flow inside a microchannel. The scale bar represents 50  $\mu\text{m}$ .

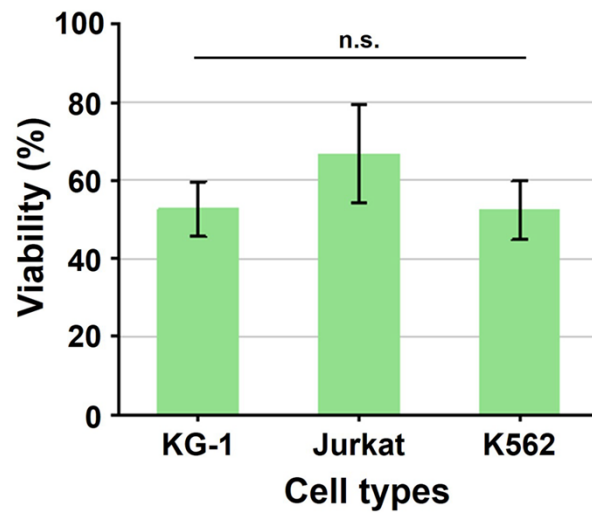

**Figure S3. Viability of 3–5 kDa FITC-dextran delivery for three different immune cell lines.** All the error bars indicate the mean  $\pm$  standard error of the mean (SEM) ( $N = 3$ ). n.s. indicates no significant difference, calculated using one-way ANOVA with Tukey's method.

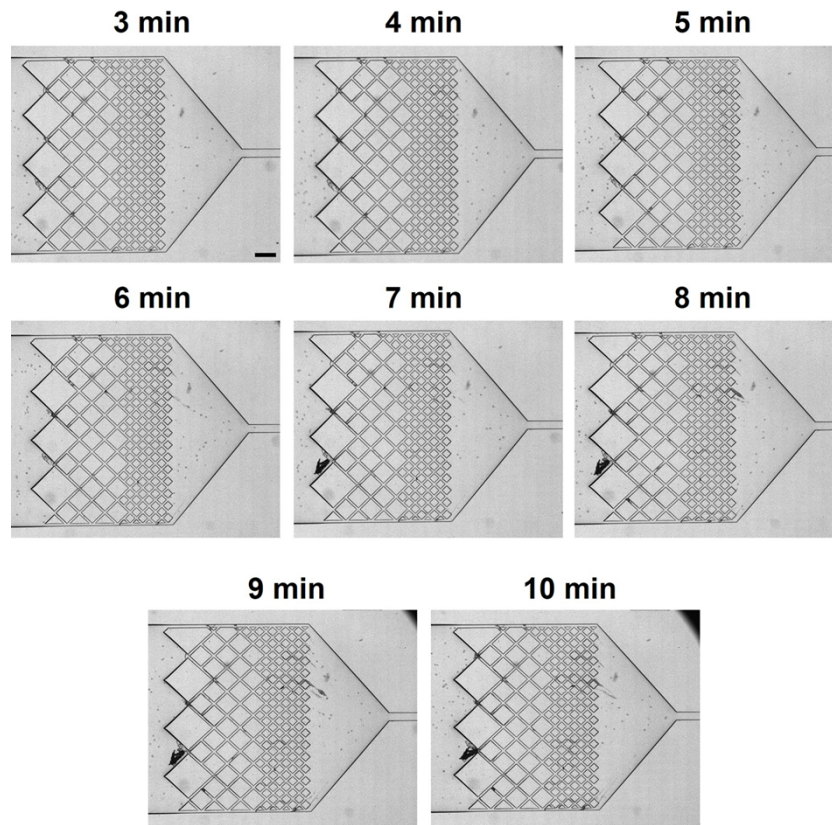

**Figure S4. Microscope images near the inlet filter region.** K562 cells with a concentration of  $5 \times 10^5$  cells/mL were flowed, and images were taken at different time points. The scale bar represents 200  $\mu\text{m}$ .

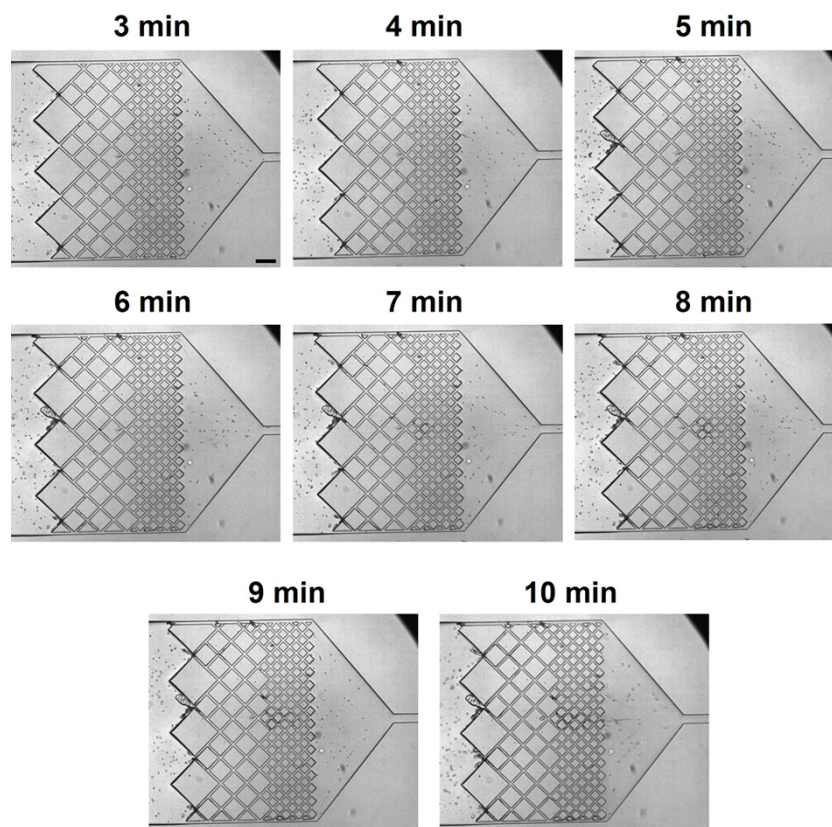

**Figure S5. Microscope images near the inlet filter region.** K562 cells with a concentration of  $1 \times 10^6$  cells/mL were flowed, and images were taken at different time points. The scale bar represents 200  $\mu\text{m}$ .

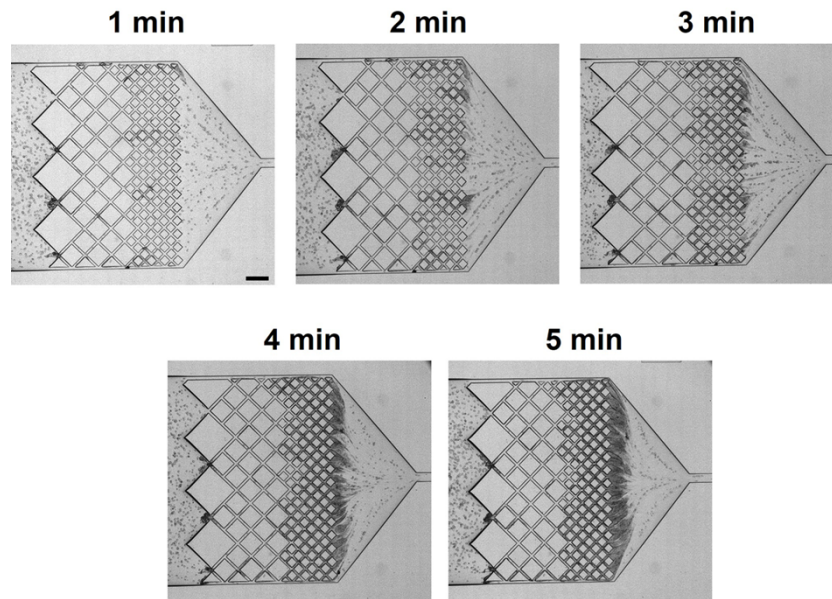

**Figure S6. Microscope images near the inlet filter region.** K562 cells with a concentration of  $5 \times 10^6$  cells/mL were flowed, and images were taken at different time points. The scale bar represents 200  $\mu\text{m}$ .

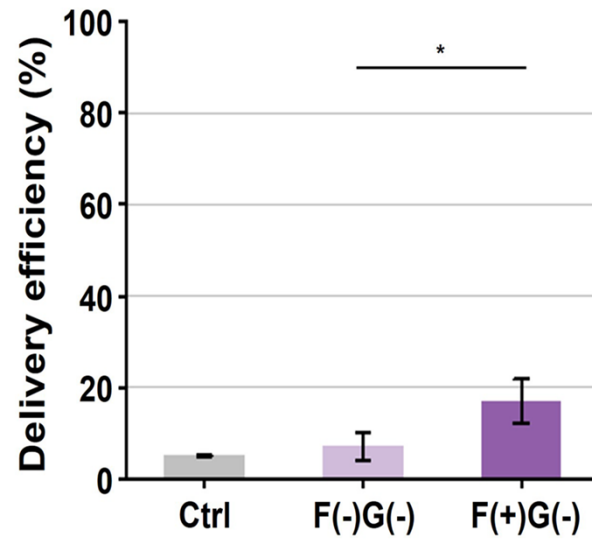

**Figure S7. Delivery efficiency for 3–5 kDa FITC-dextran delivery into K562 cells with or without mechanical filters (F) and constriction gap (G).** All the error bars indicate mean  $\pm$  standard error of the mean (SEM) ( $N = 3\text{--}4$ ). \* indicates a  $P$ -value below 0.05, calculated using one-way ANOVA with Tukey's method.



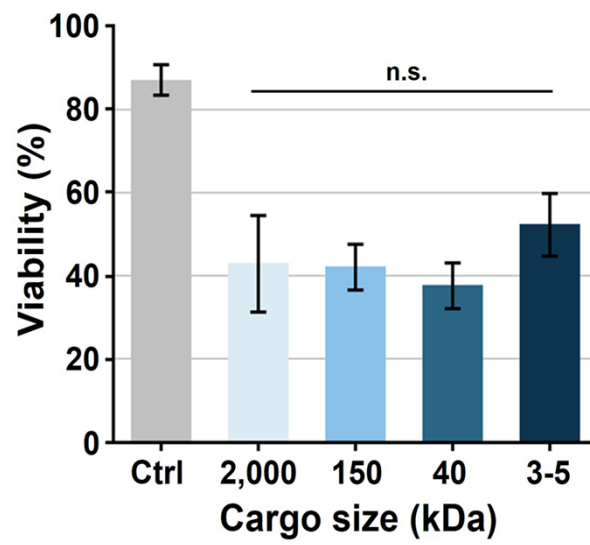

**Figure S8. K562 cell viability for different FITC-dextran delivery sizes.** All the error bars indicate the mean  $\pm$  standard error of the mean (SEM) ( $N = 3$ ). n.s. indicates no significant difference, calculated using one-way ANOVA with Tukey's method.

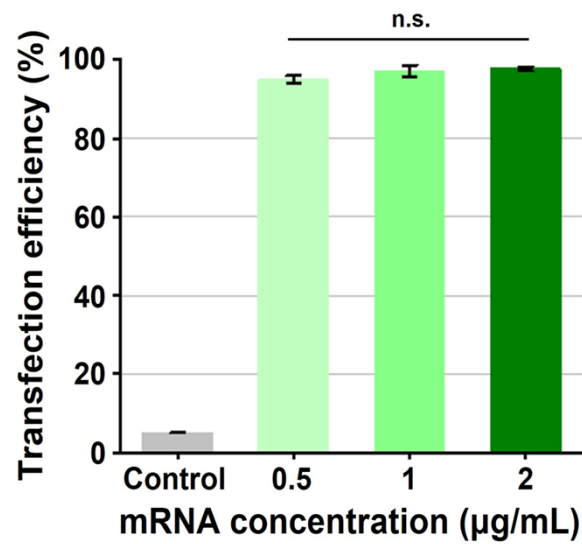

**Figure S9. Transfection efficiency of K562 cells showing EGFP expression with different mRNA concentrations.** All the error bars indicate the mean  $\pm$  standard error of the mean (SEM) ( $N = 3$ ). n.s. indicates no significant difference, calculated using one-way ANOVA with Tukey's method.

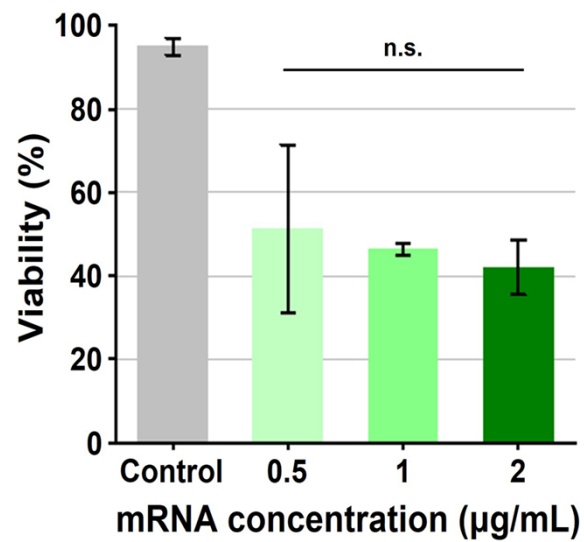

**Figure S10. Cell viability of K562 cells tested under different mRNA concentrations.** All the error bars indicate the mean  $\pm$  standard error of the mean (SEM) ( $N = 3$ ). n.s. indicates no significant difference, calculated using one-way ANOVA with Tukey's method.

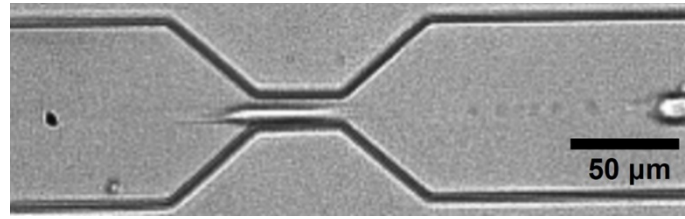

**Movie S1. High-speed microscope video of K562 cell deformation in 0.85% methylcellulose solutions.**

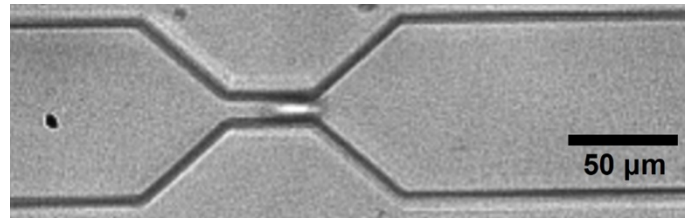

**Movie S2. High-speed microscope video of K562 cell deformation in media.**
